# Supplementary material for: Nano-Assemblies from Amphiphilic PnBA-b-POEGA Copolymers as Drug Nanocarriers
Source: MDPI journal article supplement (doi:10.3390/polym13071164), 2021-04-05
Supplement: s1 [file s1]

# Supplementary Material: Nano-Assemblies from Amphiphilic PnBA-b-POEGA Copolymers as Drug Nanocarriers

Angeliki Chroni, Thomas Mavromoustakos and Stergios Pispas

## 1. Results

### 1.1. Physicochemical Characterization of the PnBA-b-POEGA Micelles

With the purpose of examining the versatile properties of the PnBA-b-POEGA block copolymers, critical micelle concentration (CMC) values were determined using the FS technique with pyrene as the fluorescent probe. The polymer stock solutions were prepared at  $10^{-3}$  g/ml and pH = 7. The solution concentrations were prepared in a range of  $1 \times 10^{-8}$  to  $1 \times 10^{-3}$  g/ml. The calculated relative intensity ratio  $I_1/I_3$  of Py peaks versus the copolymer concentration in water for the PnBA<sub>30</sub>-b-POEGA<sub>70</sub> and PnBA<sub>27</sub>-b-POEGA<sub>73</sub> copolymers is shown in Figure S1. Higher  $M_w$  of PnBA (7800) induces a significant reduction in the CMC value of PnBA<sub>27</sub>-b-POEGA<sub>73</sub> diblock (red line) compared to PnBA<sub>30</sub>-b-POEGA<sub>70</sub> diblock (black line), which is evident in Figure S1 and consistent with the literature data [1]. Both CMC values are presented in the main text in Table 2.

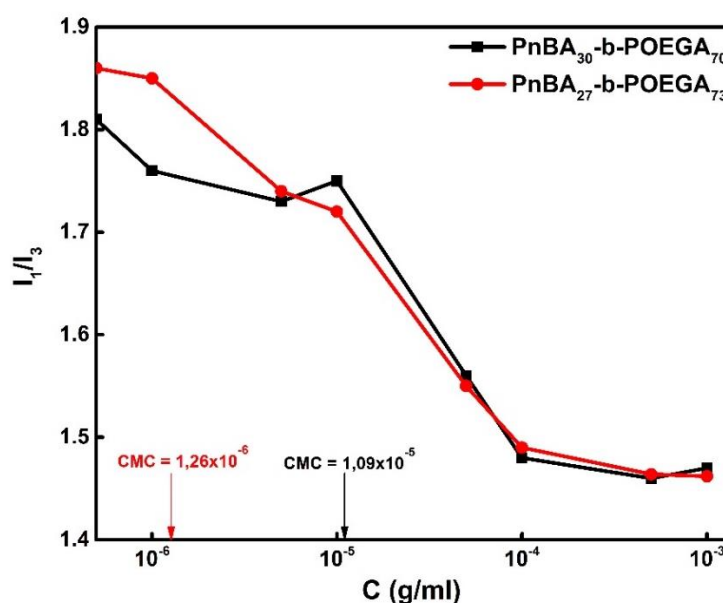

**Figure S1.** Comparative diagram of calculated relative intensity ratio  $I_1/I_3$  of pyrene peaks versus the copolymer concentration in water for the PnBA<sub>30</sub>-b-POEGA<sub>70</sub> and PnBA<sub>27</sub>-b-POEGA<sub>73</sub> copolymers.

### 1.2. FBS Interactions with PnBA-b-POEGA Block Copolymers

DLS stability studies of PnBA<sub>27</sub>-b-POEGA<sub>73</sub> micelles in FBS solutions were performed to assess the  $R_h$ , PDI, and Intensity values of the protein-polymer mixtures. A comparison of intensity size distributions of bare PnBA<sub>27</sub>-b-POEGA<sub>73</sub> (red line) micelles and FBS (black line) is exhibited in Figure S2a. The analysis of trimodal size distributions of FBS is reported in the main text. Protocol 1 [mixing of 50  $\mu$ L sample with 3 mL FBS:PBS (1/9 v/v)] used for the preparation of protein-polymer mixtures is denoted in Figure S2b, whereas protocol 2 [mixing of 100  $\mu$ L sample with 3 mL FBS:PBS (1/9 v/v) and 3 mL FBS:PBS (1/1 v/v)] in is denoted in Figures S2c to S2d. Only a few conclusions can be drawn after the incubation of PnBA<sub>27</sub>-b-POEGA<sub>73</sub> micelles with FBS (for both protocols)

due to the intrinsic difficulty in separating the DLS signals of the bare micelles (24 nm) and the second population of FBS (23 nm). A bimodal distribution appeared in Figure S2b, corresponding to protocol 1, with peaks emerging at 8 nm (possibly free BSA) and 60 nm (possibly protein–polymer complexes). Based on protocol 2 at FBS:PBS (1/9 v/v) ratio, a co-existence of free serum proteins at 4 nm and decreased size micelles at 17 nm is depicted in Figure S2c. A rather broad size distribution emerged in Figure S2d at FBS:PBS (1/1 v/v) ratio using protocol 2, the size of which is slightly decreased (18 nm) compared to bare micelles (24 nm). Ultimately, the PnBA<sub>27</sub>-b-POEGA<sub>73</sub> micelles maintained their synthetic identity after the incubation with FBS, indicating good stability in a biological medium.

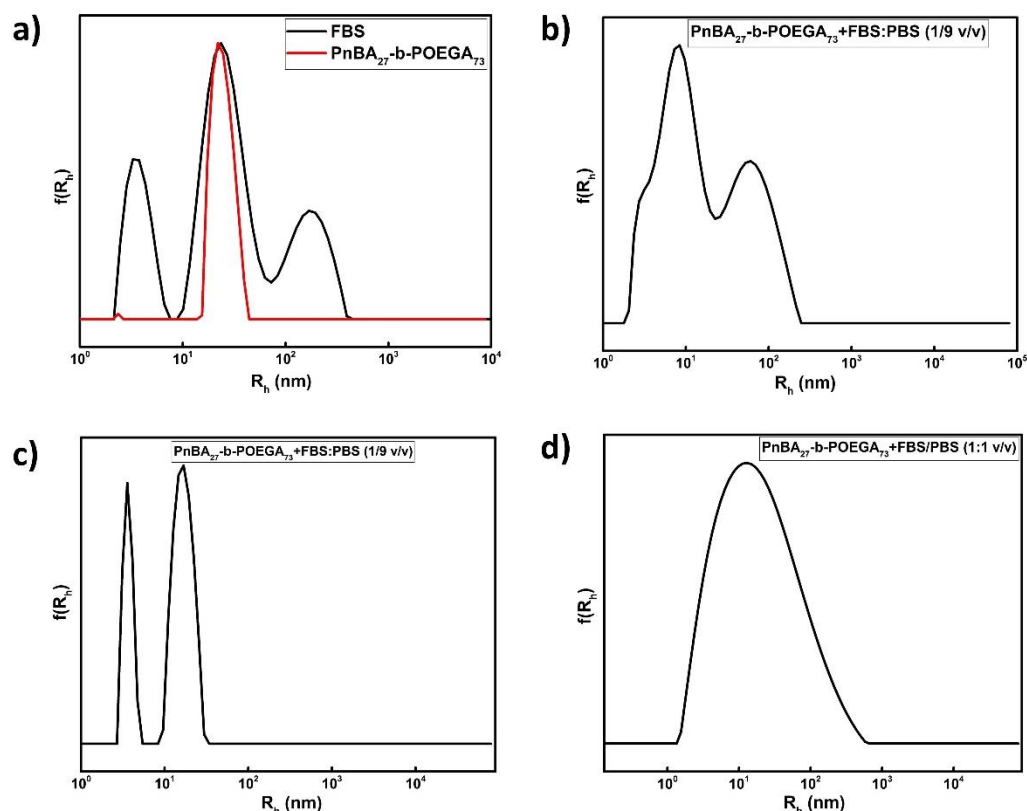

### 1.3. DLS measurements as a Function of Temperature

**Figure S2.** a) Comparative size distributions of bare PnBA<sub>27</sub>-b-POEGA<sub>73</sub> micelles and FBS, b) intensity size distributions of PnBA<sub>27</sub>-b-POEGA<sub>73</sub>+FBS:PBS (1/9 v/v) using protocol 1, c) size distributions of PnBA<sub>27</sub>-b-POEGA<sub>73</sub>+FBS:PBS (1/9 v/v) using protocol 2, and d) size distributions of PnBA<sub>27</sub>-b-POEGA<sub>73</sub>+FBS:PBS (1/1 v/v) using protocol 2.

Aqueous micellar solutions of PnBA-b-POEGA block copolymers were prepared and characterized using DLS to further probe the effect of temperature on their self-assembly. The measurements were performed at a concentration of  $10^{-3}$  g / ml and pH = 7 and at a temperature range of 25 °C–55 °C. Figure S3 exhibits the  $R_h$  and intensity measurements as a function of temperature at a 90° angle for the PnBA<sub>30</sub>-b-POEGA<sub>70</sub> diblock copolymer. The scattered light intensity slightly increases as temperature rises from 25 °C to 55 °C, resulting to the formation of increased-mass nanostructures. In parallel, the  $R_h$  decreases with increasing temperature due to the shrinkage of polymer chains and the intrinsic aggregation tendency of the system. In relation to DLS data, the PnBA<sub>30</sub>-b-POEGA<sub>70</sub> micelles may be considered temperature-independent.

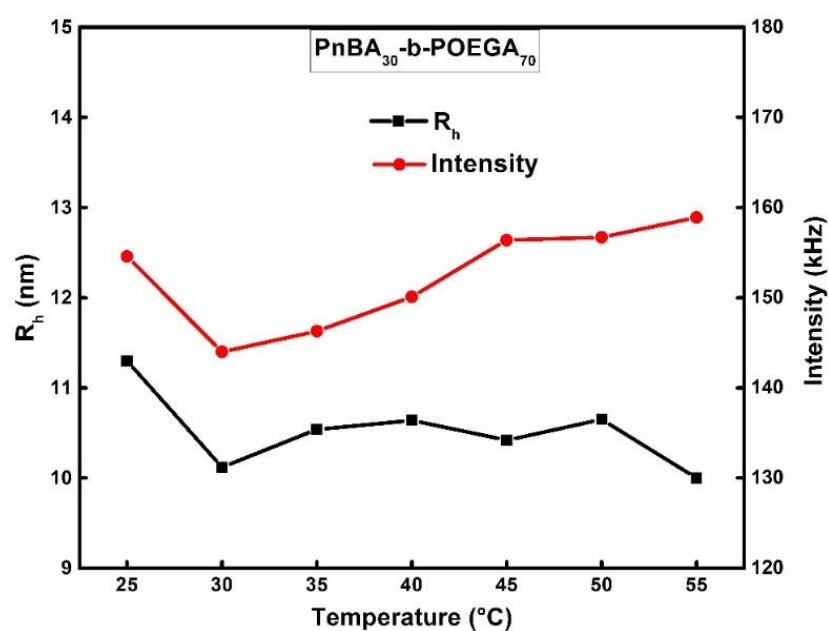

**Figure S3.**  $R_h$  and Intensity measurements as a function of temperature for the PnBA<sub>30</sub>-b-POEGA<sub>70</sub> block copolymers in aqueous solutions at 90 degrees.

#### 1.4. Chemical Shift as a Function of Temperature

The changes in chemical shift as a function of the temperature of PnBA<sub>30</sub>-b-POEGA<sub>70</sub> block copolymers is presented in Figure S4 to provide a clearer view of the shift of the <sup>1</sup>H-NMR spectra (Figure 15 exhibited in the main text) to the lower field regions.

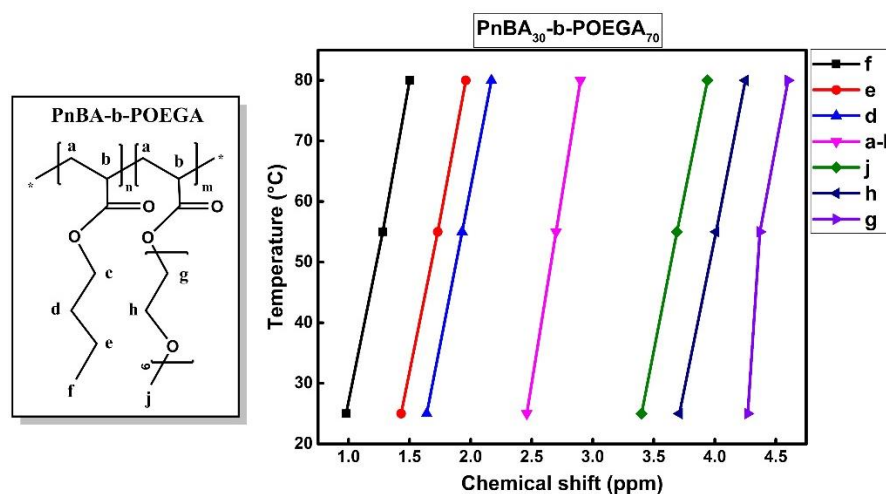

**Figure S4.** <sup>1</sup>H-NMR chemical shifts as a function of temperature for the PnBA<sub>30</sub>-b-POEGA<sub>70</sub> block copolymers.

## References

1. Antoun, S.; Gohy, J.-F.; Jérôme, R. Micellization of quaternized poly (2-(dimethylamino) ethyl methacrylate)-block-poly (methyl methacrylate) copolymers in water. *Polymer* **2001**, *42*, 3641–3648, doi:10.1016/S0032-3861(00)00746-1.
